# Supplementary material
Source: Springer Nature journal article supplement (https://www.springermedizin.de/resource/supplementary/12961_2010_165_MOESM2_ESM.pdf/9571704)
Supplement: MOESM2 [file 9571704]

**Actionable Items    Ministries/Departments    Health Administration    Health Care Delivery**

**Social Determinants of Health**  
 Health financing  
 Health insurance  
 Tobacco control

**Rural and urban planning**  
 Physical activity promotion  
 Work-commute-leisure

**Healthy food choices**  
 Legislative control of SFA, TFA, etc  
 Salt and alcohol control

**Improving literacy**  
 Health literacy  
 School based programs

**Inexpensive drug development**  
 Device regulation

**Medical Education**

**Effective Preventive Healthcare Delivery**

Finance,  
Commerce,  
Insurance, Industry

Social Development  
Women & Child  
Poverty Alleviation

Rural/Urban  
development  
Transport  
Public Works  
Water & Sanitation

Agriculture  
Food & Civil Supplies

Education  
Technical education  
Human Resources

Medical Education  
Drugs & Chemicals  
Ministry of Health

**Planning**

**Ministry of Health**

Family Welfare

Health Department

Medical Education

Research

State Health Ministry & Coordination

Maternal & Child  
Health Programs

Non-Communicable  
Diseases Programs

Communicable  
Diseases Programs

Primary Care

Secondary Care  
District Level

Tertiary Level  
Healthcare Units

**Risk factor control**  
**Risk management**  
**Acute CVD management**  
**Secondary prevention**

**Integration of governmental and non-governmental organizations**

**← Phases of Prevention in National Cardiovascular Disease Control Program →**
